# Supplementary material for: Clinical relevance of circulating MACC1 and S100A4 transcripts for ovarian cancer
Source: PubMed Central journal article supplement (PMC6487687; doi:10.1002/1878-0261.12484), 2019-04-15

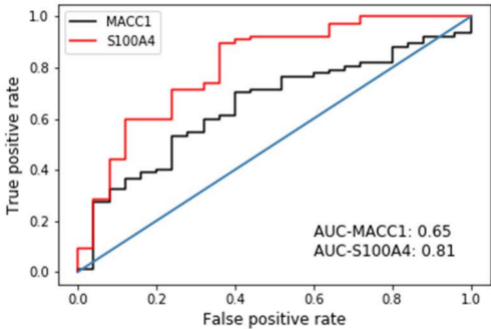

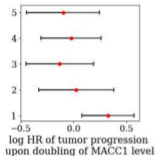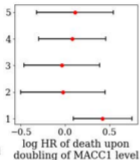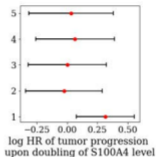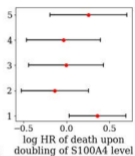

- 1 = patients at primary diagnosis
- 2 = patients postoperative
- 3 = patients before CTx
- 4 = patients after third cycle CTx
- 5 = patients after CTx

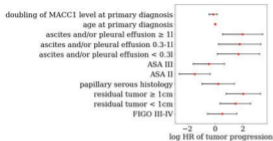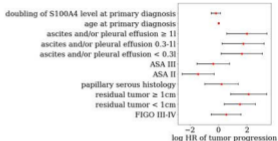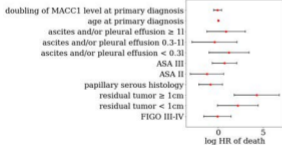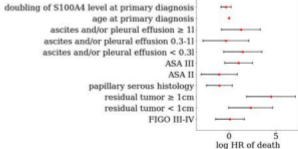

Supplement: MOL2-13-1268-s001.pdf [file MOL2-13-1268-s001.pdf]
